# Supplementary material for: A high performance polysiloxane-based single ion conducting polymeric electrolyte membrane for application in lithium ion batteries
Source: Royal Society of Chemistry journal article supplement (doi:10.1039/c5ta02628h), 2015-01-01
Supplement: c5ta02628h1.pdf [file c5ta02628h1.pdf]

## Supporting Information

### A High Performance Polysiloxane-Based Single Ion Conducting Polymeric Electrolyte Membrane for Applications in Lithium Ion Batteries

*Rupesh Rohan,<sup>[a]</sup> Kapil Pareek,<sup>[a]</sup> Zhongxin Chen,<sup>[a]</sup> Weiwei Cai,<sup>[a,b]</sup> Yunfeng Zhang,<sup>[a,b]</sup> Guodong Xu,<sup>[a]</sup> Zhiqiang Gao,<sup>[a]</sup> Hansong Cheng<sup>\*,[a,b]</sup>*

[a] Department of Chemistry, National University of Singapore, 3 Science Drive 3, Singapore

[b] Sustainable Energy Laboratory, Faculty of Materials Science and Chemistry, China University of Geosciences, 388, Lumo Road, Wuhan 430074, P. R. China

**Table S1: Deviation in the calculated and found values of Si content in commercially available materials**

| Element      | Poly(methylhydrogensiloxane)<br>(CH <sub>4</sub> OSi) |           | Poly(methylphenylsiloxane)<br>(C <sub>7</sub> H <sub>8</sub> OSi) |           |
|--------------|-------------------------------------------------------|-----------|-------------------------------------------------------------------|-----------|
|              | Calculated (%)                                        | Found (%) | Calculated (%)                                                    | Found (%) |
| Carbon (C)   | 19.98                                                 | 20.27     | 61.72                                                             | 59.73     |
| Hydrogen (H) | 6.71                                                  | 6.38      | 5.92                                                              | 5.62      |
| Silicon (Si) | 46.71                                                 | < 0.5%    | 20.62                                                             | 2.62      |

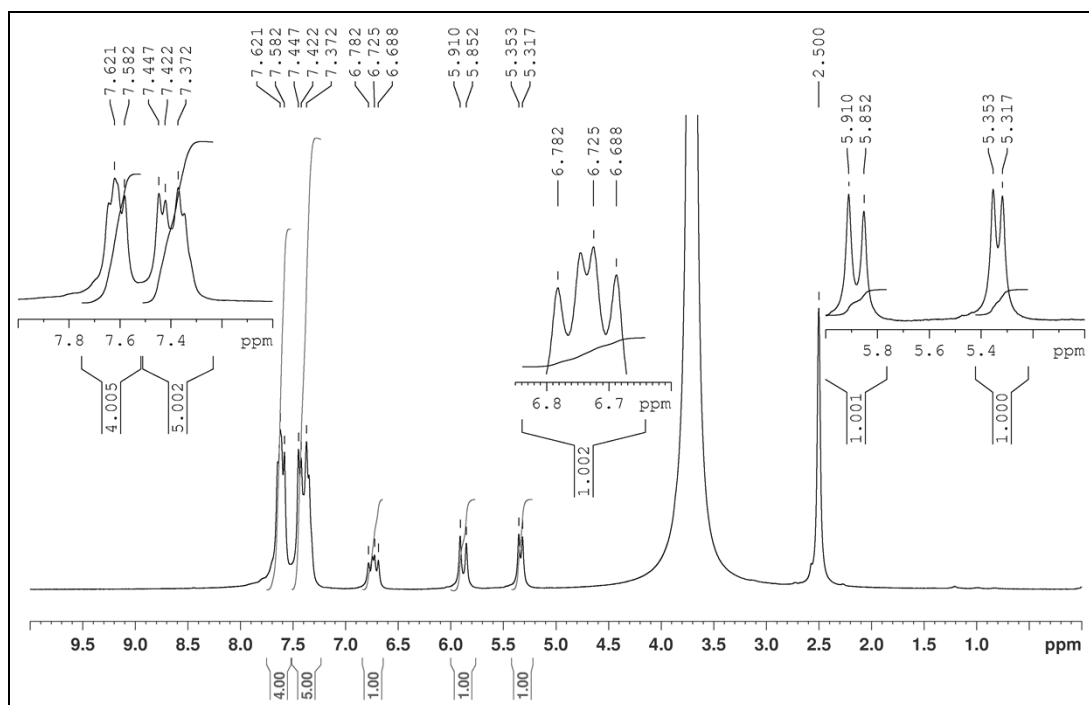

**Figure S1: The  $^1\text{H}$ NMR spectra of SPSIK in  $\text{DMSO-d}_6$ . The broad peak at 3.70 ppm corresponds to absorbed moisture)**

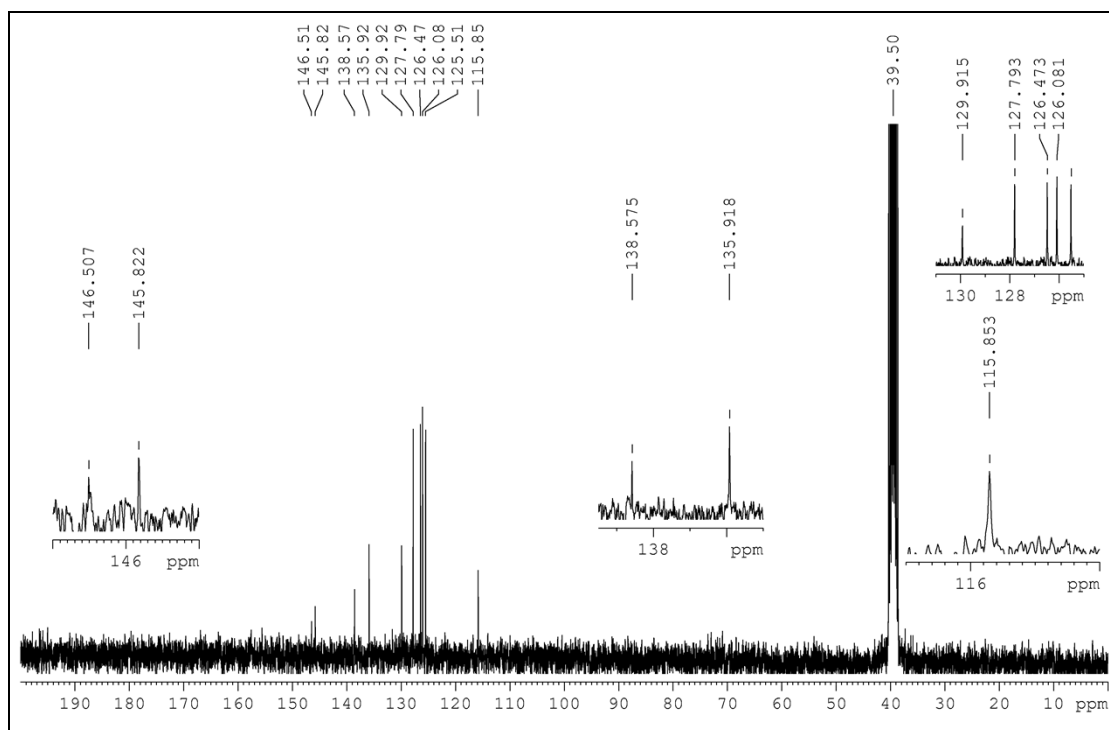

**Figure S2: The  $^{13}\text{C}$ NMR spectra of SPSIK in  $\text{DMSO-d}_6$ .**

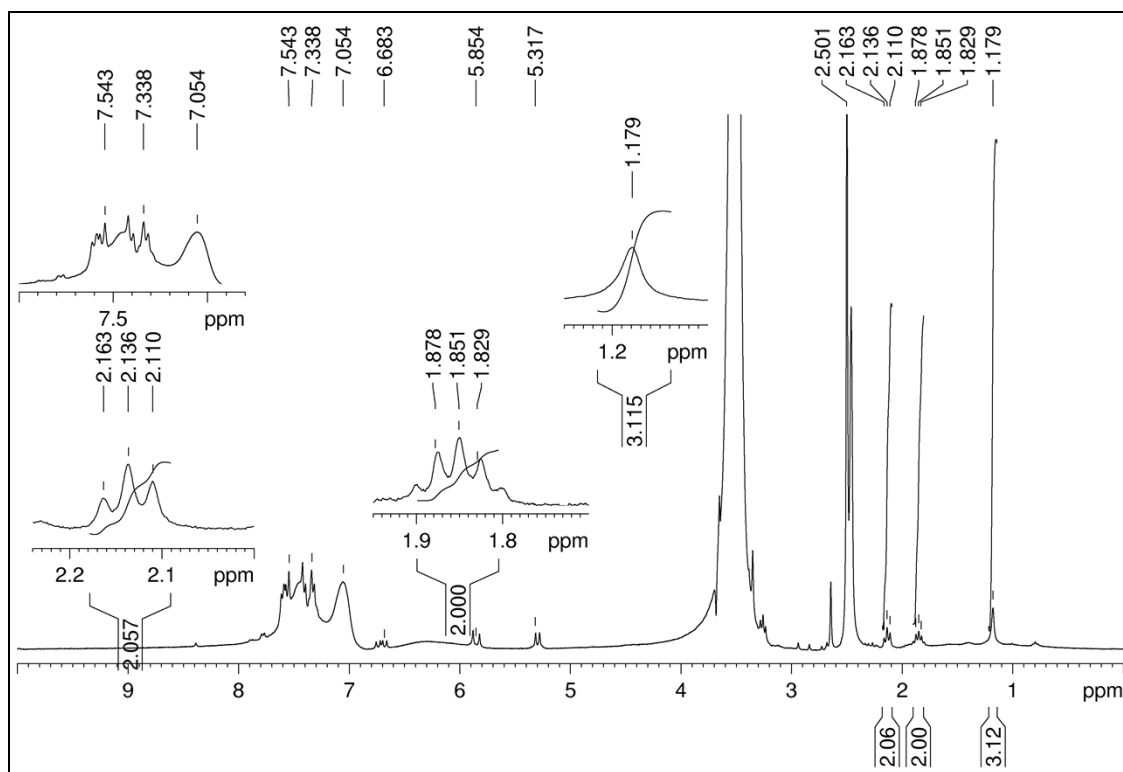

**Figure S3:** The  $^1\text{H}$ NMR spectra of SG in  $\text{DMSO-d}_6$ . The peak at 3.25 ppm corresponds to absorbed moisture.

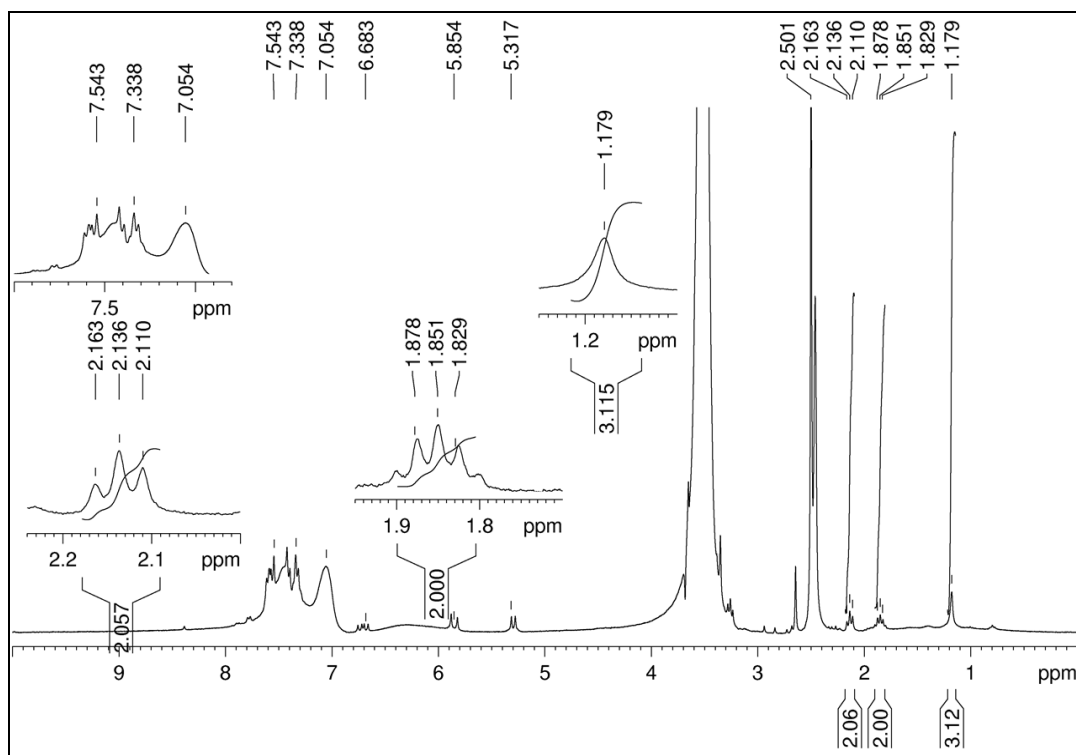

**Figure S4: The  $^{13}\text{C}$  NMR spectra of SG in  $\text{DMSO-d}_6$ .**

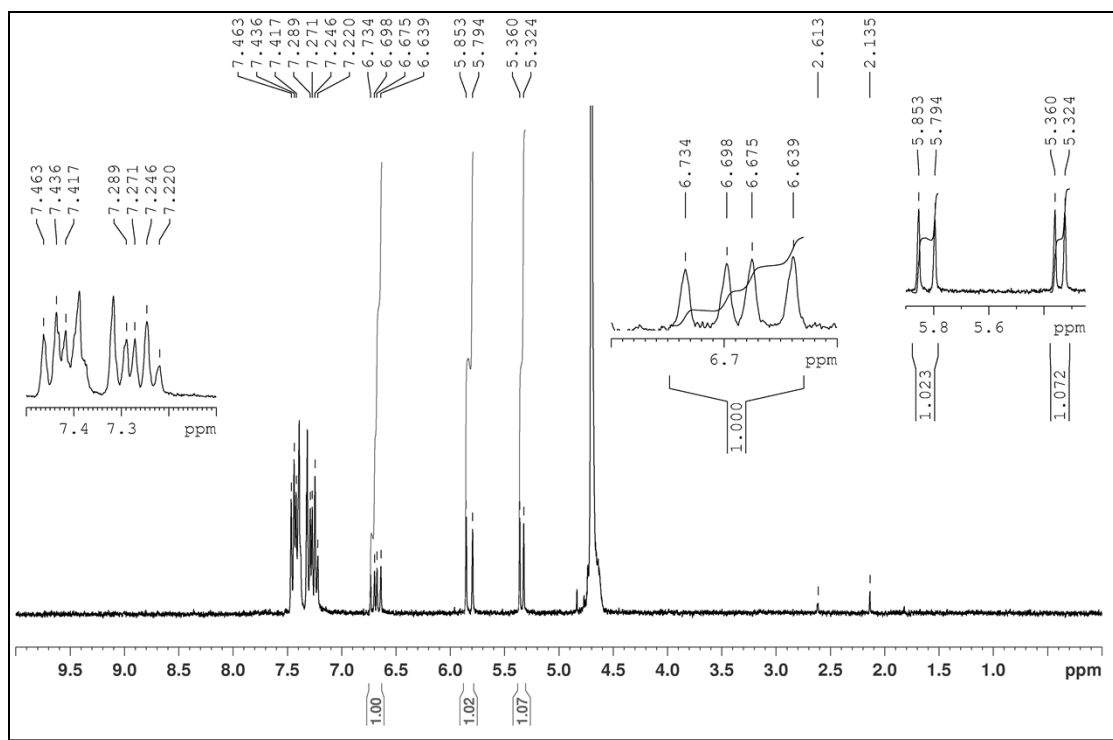

**Figure S5: The  $^1\text{H}$ NMR spectra of 4-styrenesulfonic acid, sodium salt in  $\text{D}_2\text{O}$ .**

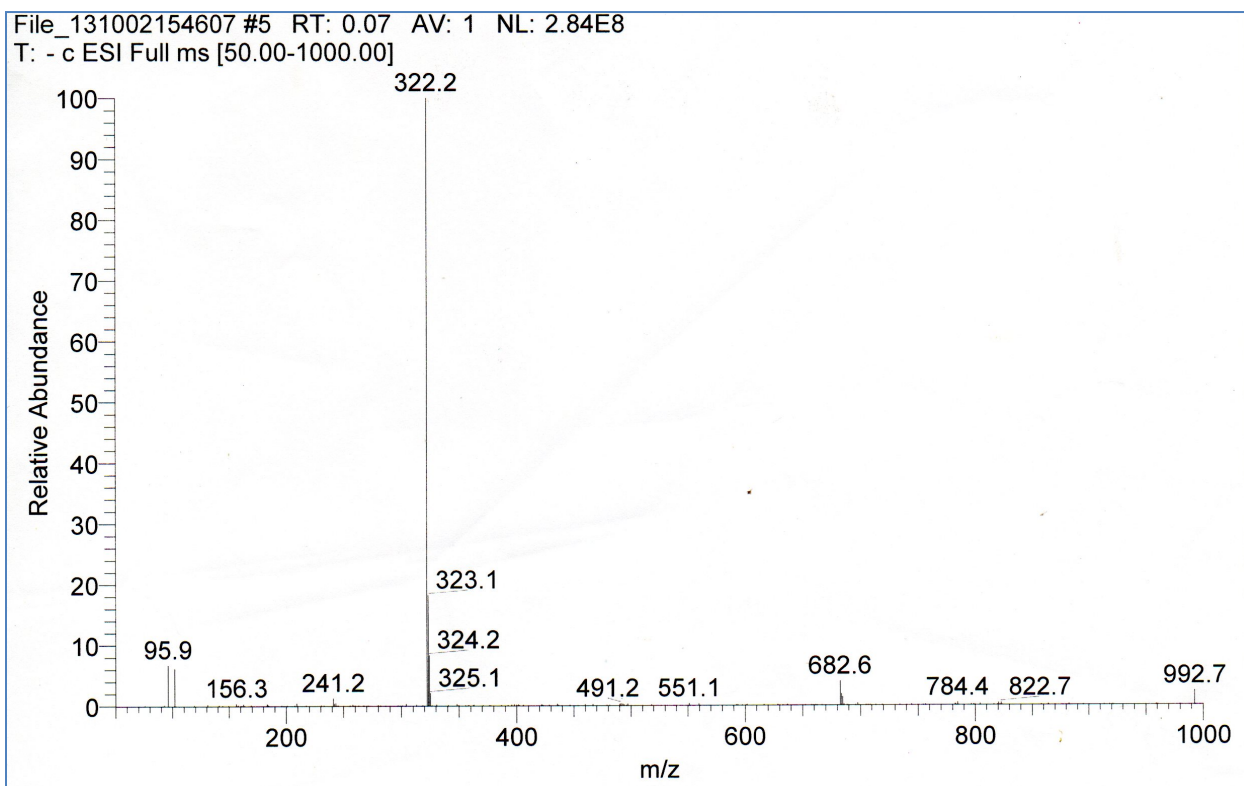

**Figure S6: The negative mode of ESI-HRMS (mass spectroscopy) spectra of SG.**
